# Supplementary material for: Abnormal and Euthyroid Ranges of Thyroid Hormones in Serum and Liver Cancer Mortality: A Cohort Study
Source: Oxford University Press journal article supplement (doi:10.1158/1055-9965.epi-20-0283), 2020-07-22
Supplement: 10559965epi200283-sup-237952_3_supp_6414262_qd7ddl.docx [file 10559965epi200283-sup-237952_3_supp_6414262_qd7ddl.docx]

**Supplementary Table 6.** Hazard ratios (95% CIs) for liver cancer mortality baseline thyroid hormone level within the euthyroid range

| TSH (µlU/mL) | Multivariable-adjusted HR†  (95% CI) | FT4 (ng/dL) | Multivariable-adjusted HR†  (95% CI) |
| --- | --- | --- | --- |
| Tertile 1 (n = 155,578) | 1.00 (reference) | Tertile 1 (n = 182,175) | 1.00 (reference) |
| Tertile 2 (n = 155,578) | 0.90 (0.68-1.18) | Tertile 2 (n = 159,574) | 0.58 (0.45-0.76) |
| Tertile 3 (n = 155,313) | 1.13(0.87-1.46) | Tertile 3 (n = 170,400) | 0.58 (0.43-0.77) |
| *P* for trend | .331 | *P* for trend | < .001 |

*Note:* Cox proportional hazard models using age as a timescale were used to estimate hazard ratios and 95% confidence intervals.

†Multivariable model 1 was adjusted for age (timescale), sex (male or female), center (Seoul or Suwon), year of screening exam (1-year category), smoking status (never, past, current, or unknown), alcohol intake (none, < 20, or ≥ 20 g/day, unknown), regular exercise (< 3, ≥ 3 times a week, or unknown), BMI (continuous), education level (< community college graduate, ≥ community college graduate, or unknown), and family history of cancer (no, yes, or unknown), viral hepatitis (no or yes), fatty liver (no or yes), liver cirrhosis (no or yes), and FIB-4 (continuous).
